# Supplementary material
Source: PubMed Central journal article supplement (PMC4330767)

$^1\text{H}$  NMR spectrum of LE3B (*Kanakugiol*) by using 400 MHz Bruker. 

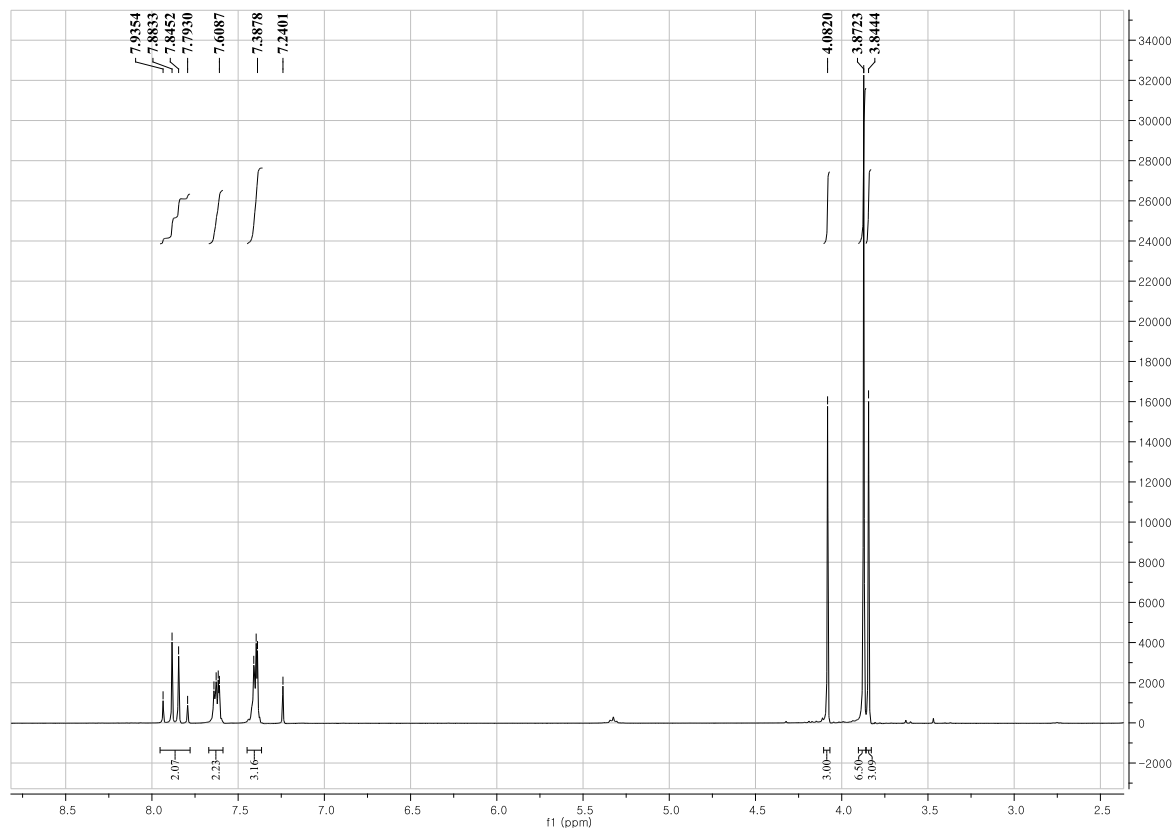

$^1\text{H}$  NMR spectrum of LE3E (*Methyl linderone*) by using 400 MHz Bruker. 

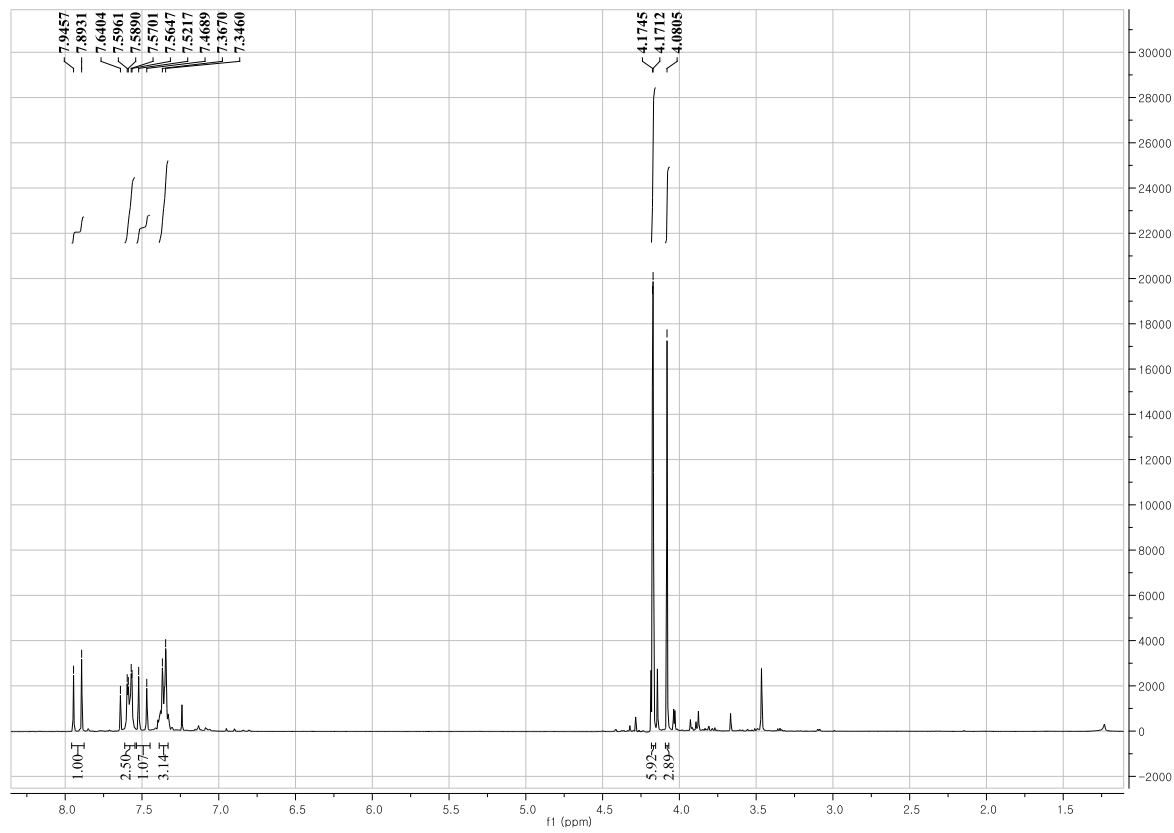

$^1\text{H}$  NMR spectrum of LE3G (*Methyl lucidone*) by using 400 MHz Bruker. 

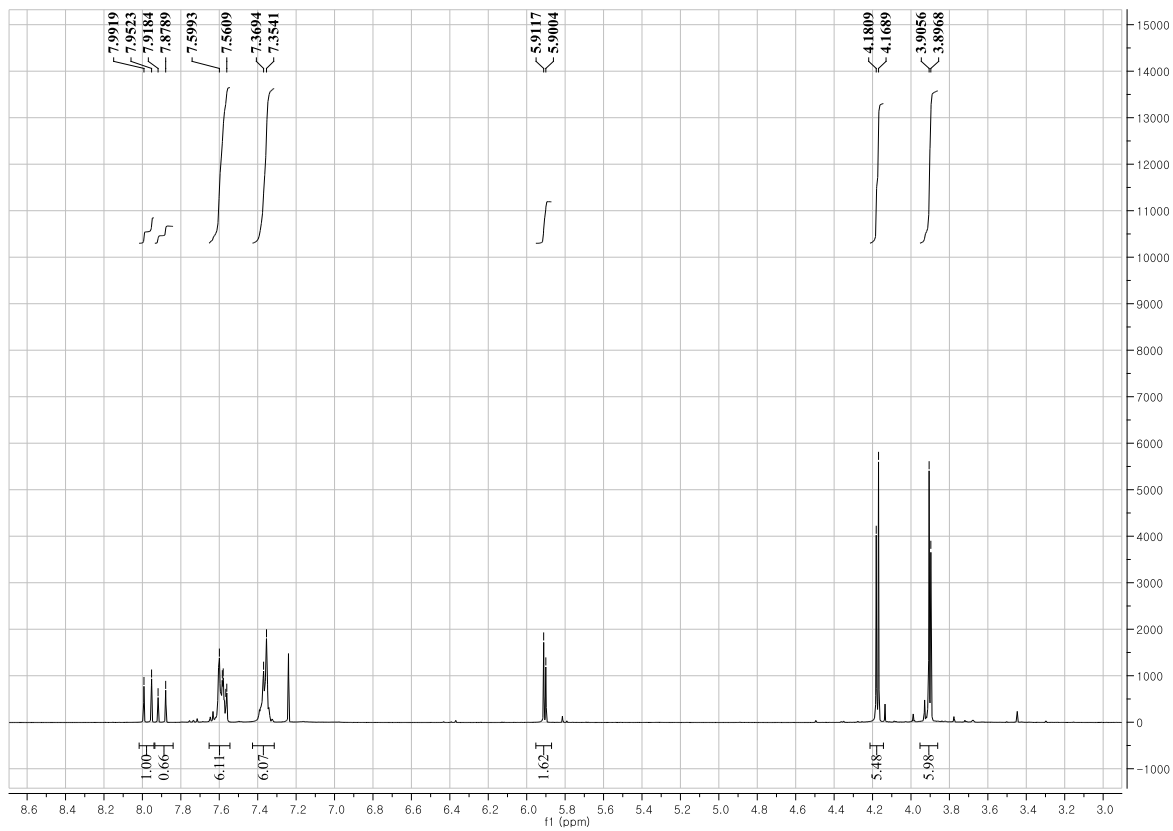

$^1\text{H}$  NMR spectrum of SS2A (*Solidago acid A*) by using 400 MHz Bruker. 

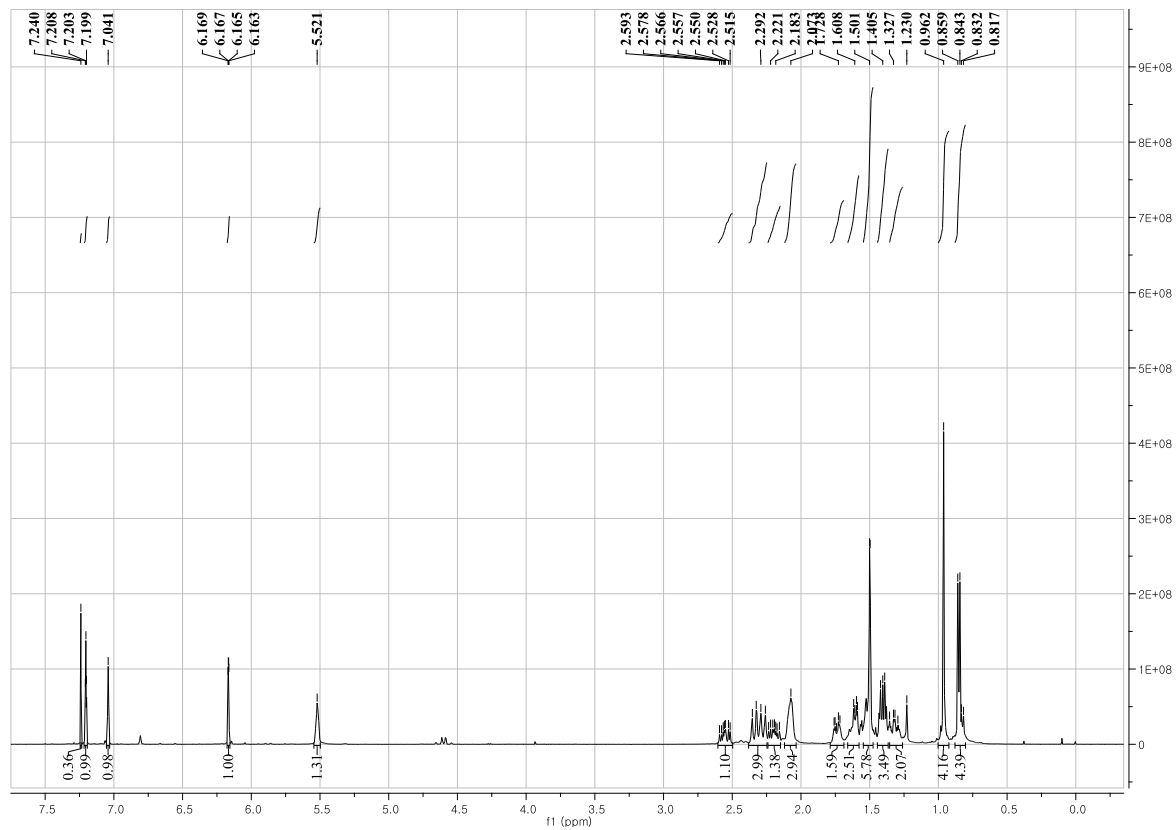

$^1\text{H}$  NMR spectrum of SS5A (*Kingidiol*) by using 400 MHz Bruker. 

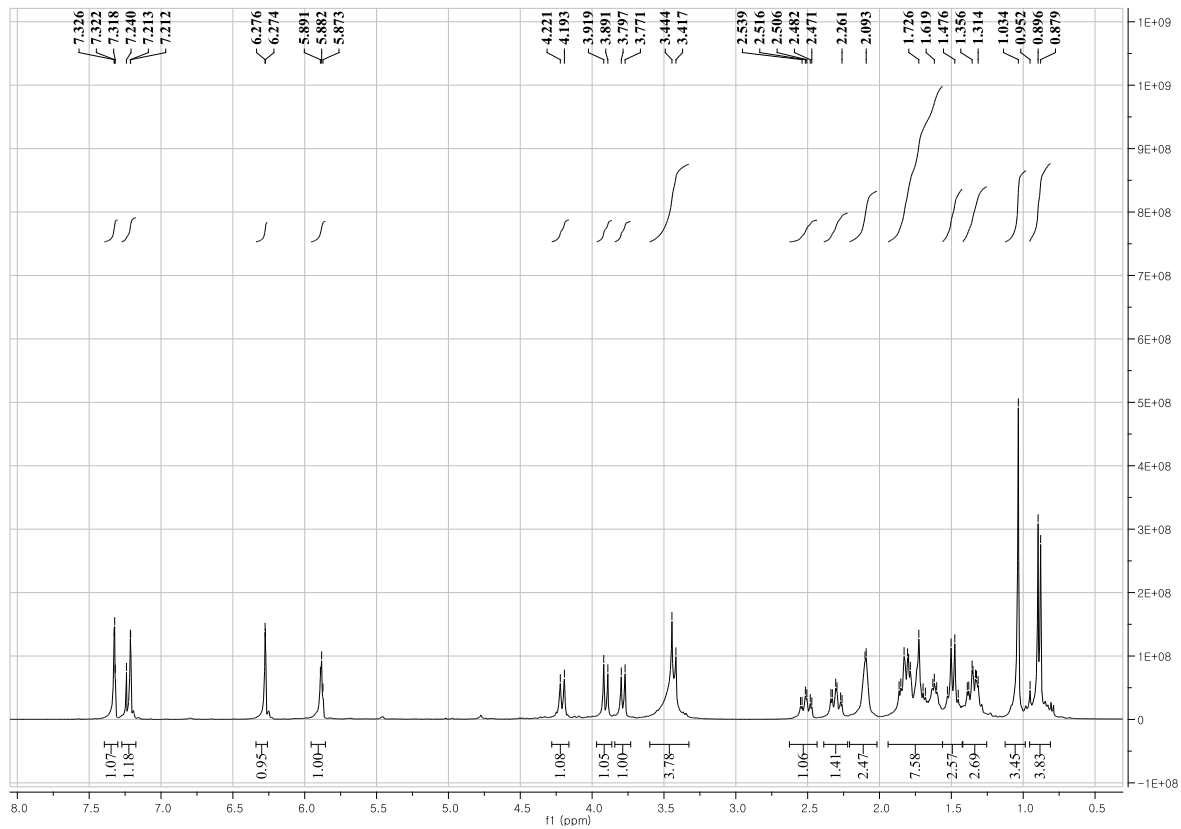

$^{13}\text{C}$  NMR spectrum of LE3B (*Kanakugiol*) by using 75 MHz Bruker. 

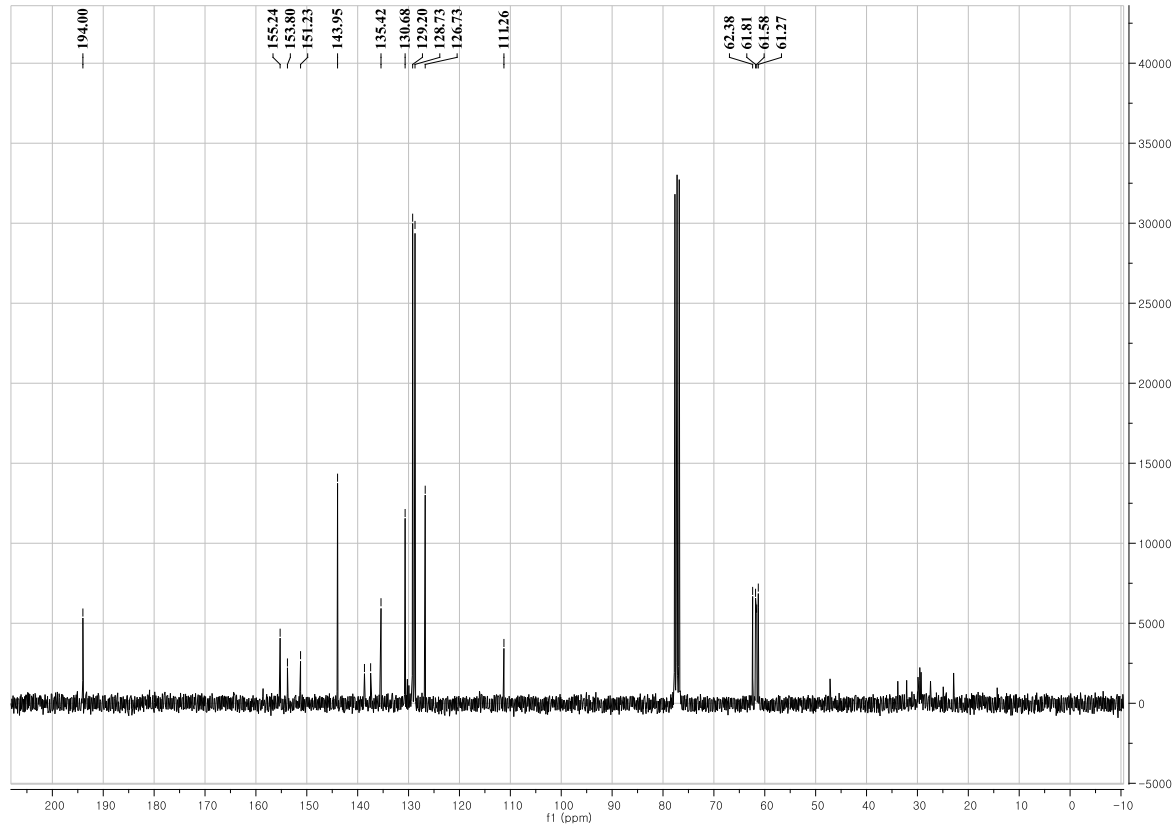

$^{13}\text{C}$  NMR spectrum of LE3E (*Methyl linderone*) by using 75 MHz Bruker.  $\text{♩}$

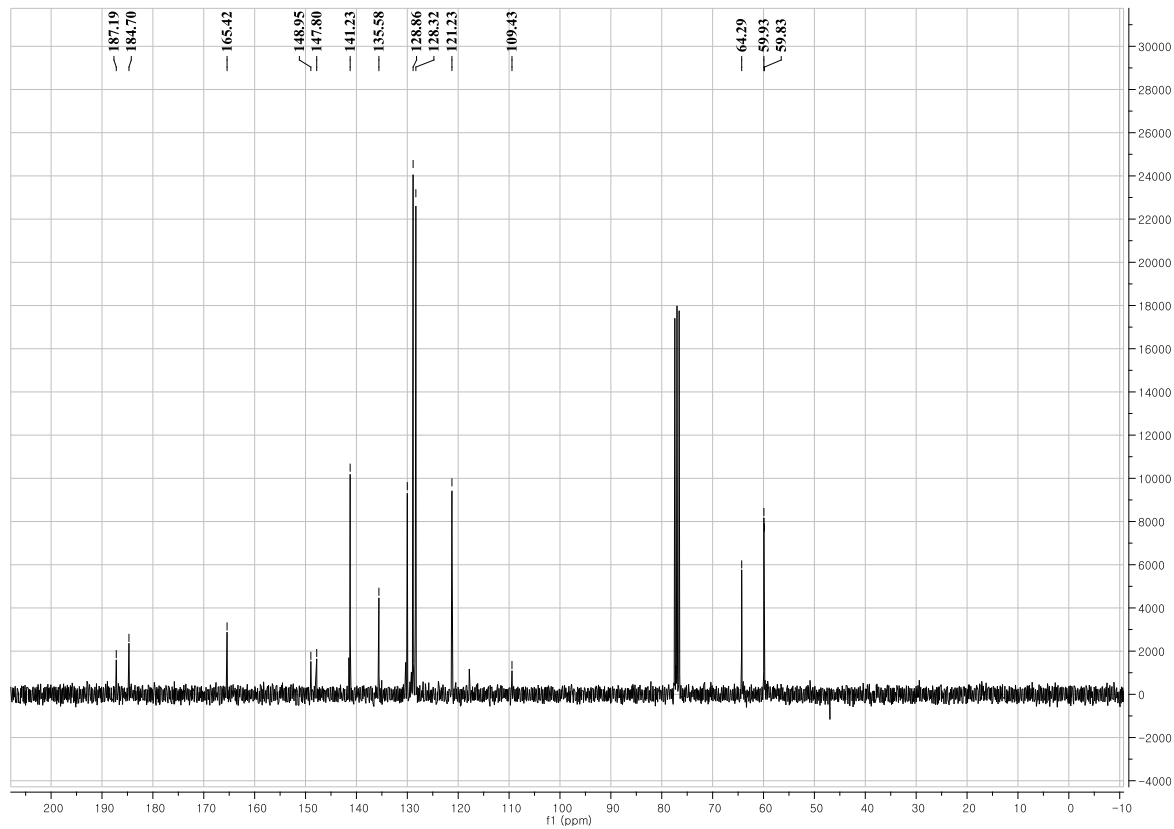

$^{13}\text{C}$  NMR spectrum of LE3G (*Methyl lucidone*) by using 75 MHz Bruker. 

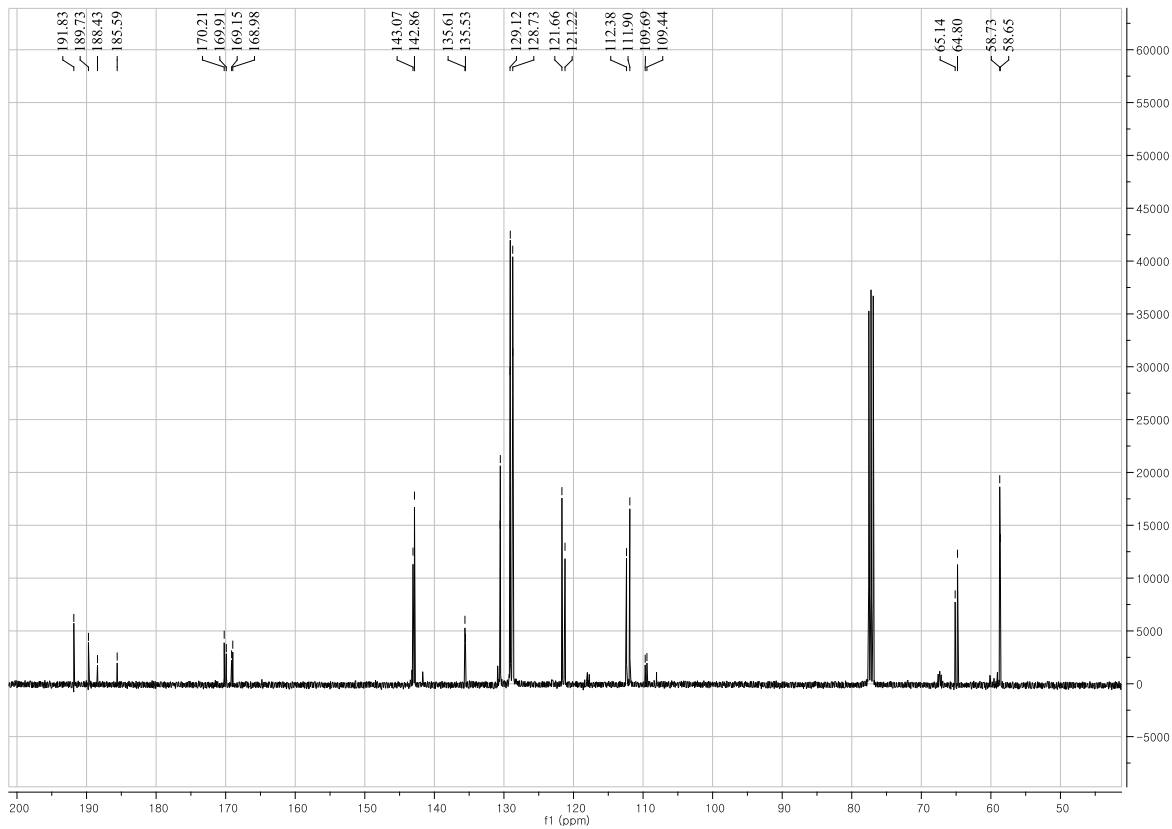



$^{13}\text{C}$  NMR spectrum of SS2A (*Solidago acid A*) by using 75 MHz Bruker. 

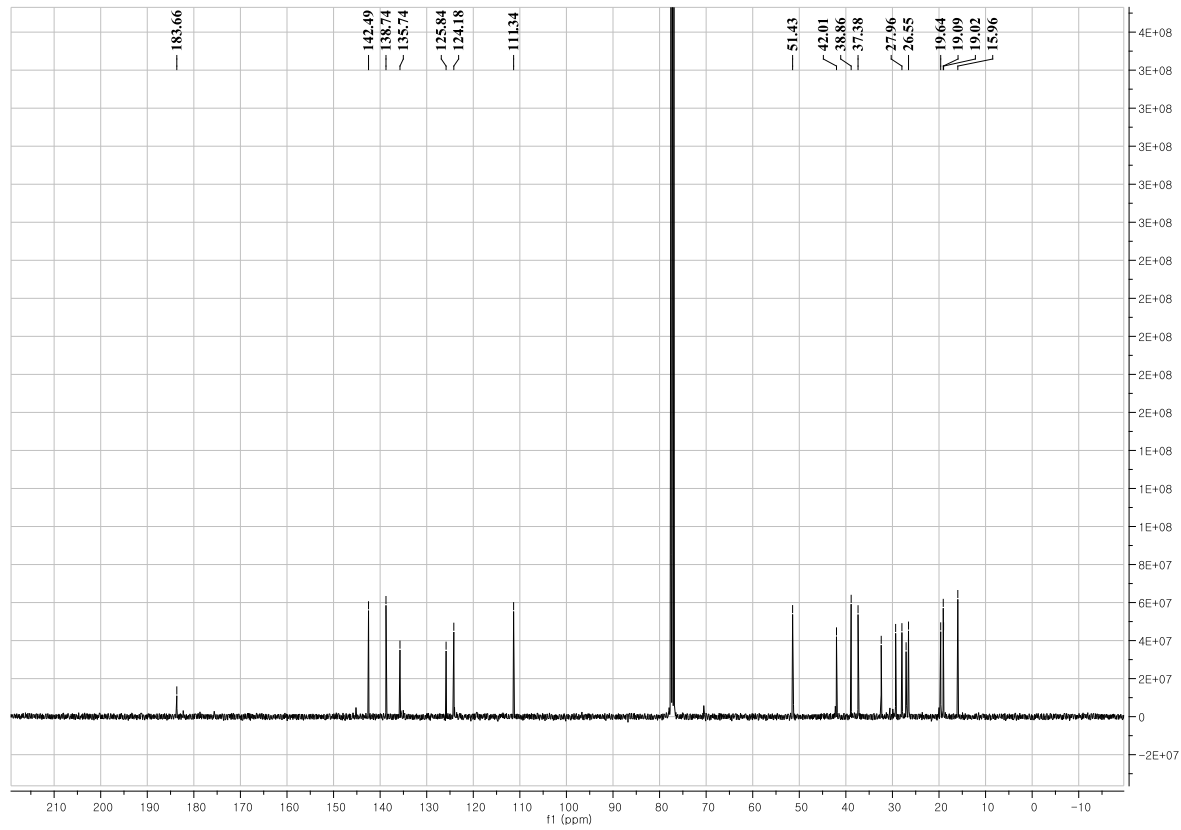

$^{13}\text{C}$  NMR spectrum of SS5A (*Kingidiol*) by using 75 MHz Bruker. 

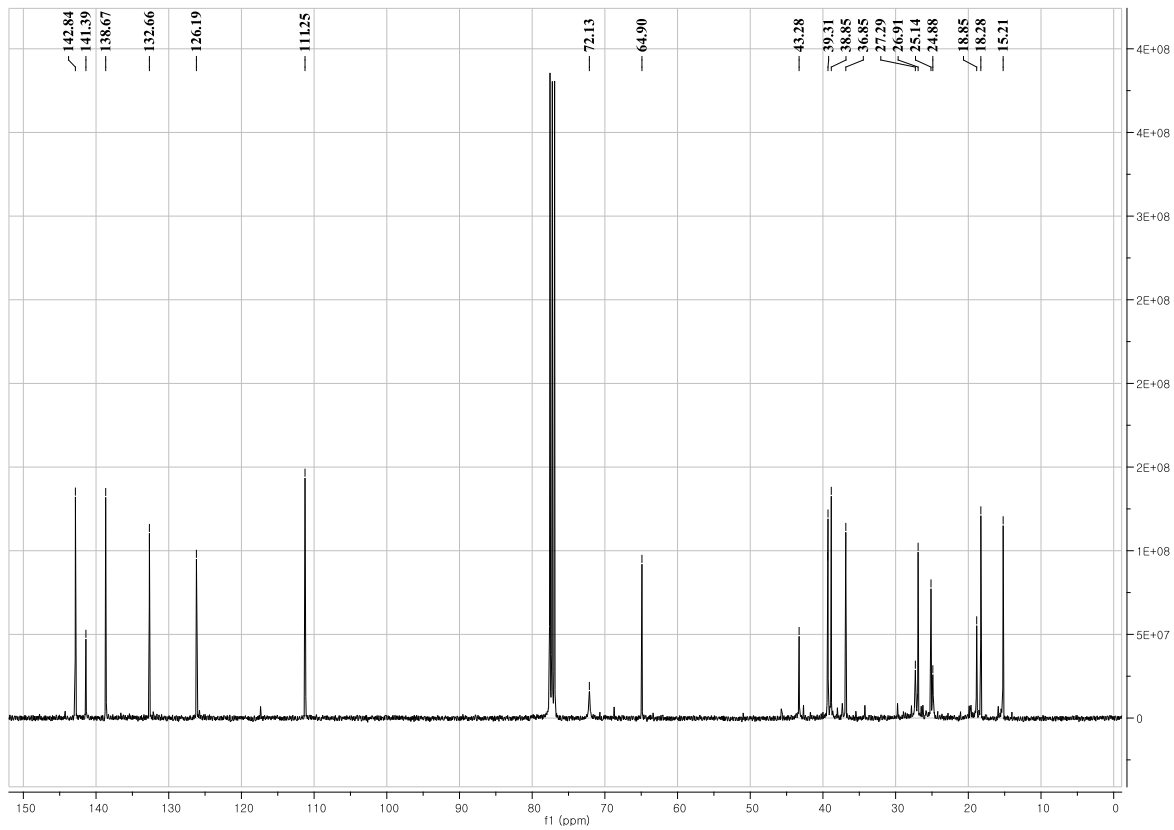

# Supplementary Fig. S3K

Elemental composition report, HRESIMS spectrum and ULPC chromatogram of LE3B (*Kanakugiol*) by using Waters Q-TOF Premier

Elemental Composition Report  
Single Mass Analysis  
Tolerance = 10.0 PPM / DBE: min = -1.5, max = 50.0  
Element prediction: Off  
Number of isotope peaks used for i-FIT = 3  
Monoisotopic Mass, Even Electron Ions  
67 formula(e) evaluated with 1 results within limits (up to 50 best isotopic matches for each mass)

Elements Used:

C: 0-500 H: 0-1000 O: 0-200

Minimum:

Maximum: 5.0 10.0 -1.5 50.0

| Mass     | Calc. Mass | mDa | PPM | DBE | i-FIT | Norm | Conf(%) | Formula    |
|----------|------------|-----|-----|-----|-------|------|---------|------------|
| 345.1357 | 345.1338   | 1.9 | 5.5 | 9.5 | 47.6  | n/a  | n/a     | C19 H21 O6 |

LE\_Total\_pos\_1212\_277 (5.466) Cm (277)

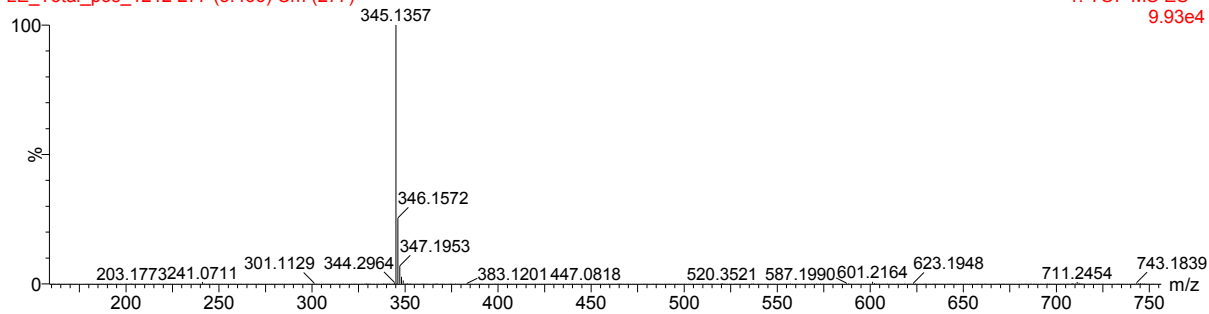

LE\_03B

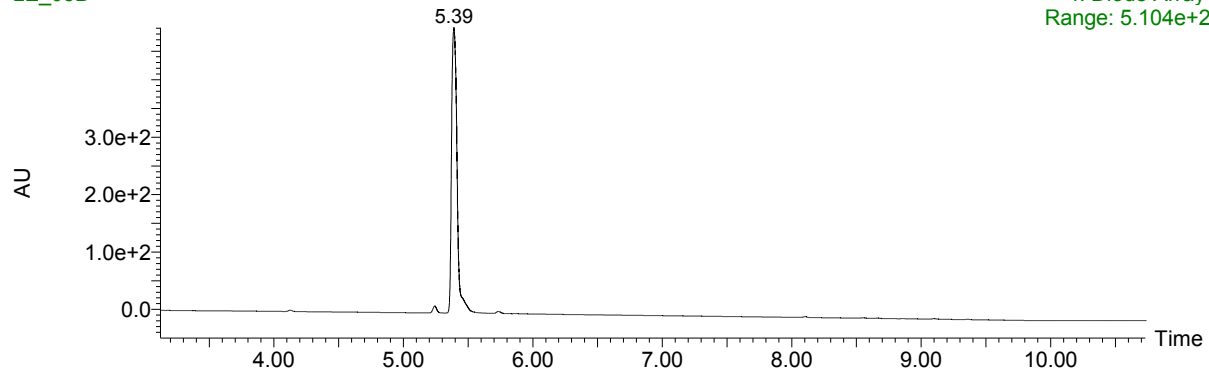

## Elemental composition report, HRESIMS spectrum and ULPC chromatogram of LE3E (*Methyl linderone*) by using Waters Q-TOF Premier

### Elemental Composition Report

Single Mass Analysis

Tolerance = 10.0 PPM / DBE: min = -1.5, max = 50.0

Element prediction: Off

Number of isotope peaks used for i-FIT = 3

Monoisotopic Mass, Even Electron Ions

53 formula(e) evaluated with 2 results within limits (up to 50 best isotopic matches for each mass)

Elements Used:

C: 0-500 H: 0-1000 O: 0-200

Minimum:

Maximum: 5.0 10.0 -1.5 50.0

| Mass     | Calc. Mass | mDa  | PPM   | DBE | i-FIT | Norm  | Conf(%) | Formula     |
|----------|------------|------|-------|-----|-------|-------|---------|-------------|
| 301.1105 | 301.1076   | 2.9  | 9.6   | 9.5 | 34.5  | 0.125 | 88.24   | C17 H17 O5  |
|          | 301.1135   | -3.0 | -10.0 | 0.5 | 36.5  | 2.141 | 11.76   | C10 H21 O10 |

LE\_Total\_pos\_1212 237 (4.668) Cm (237:238)

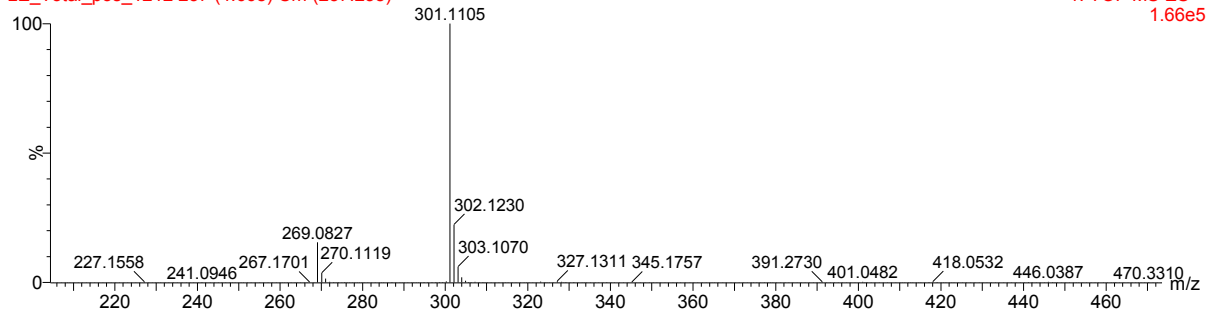

LE\_3EA

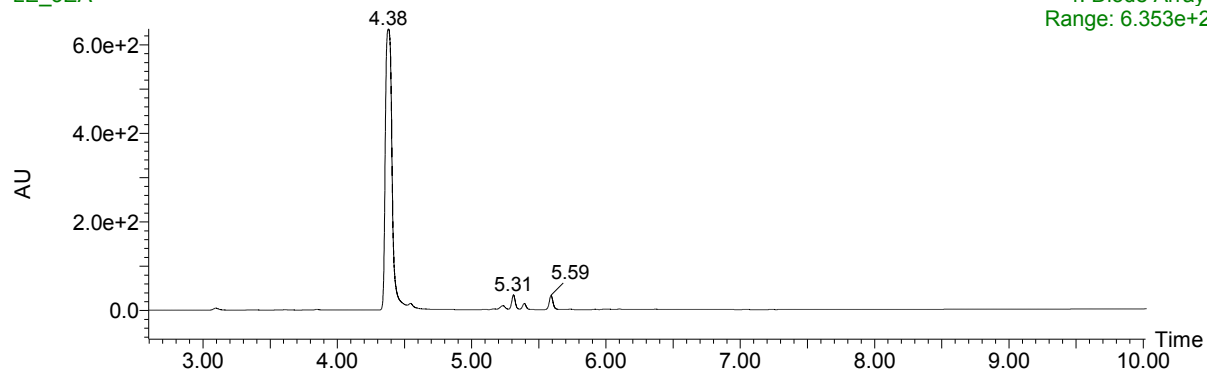

# Supplementary Fig. S3M

Elemental composition report, HRESIMS spectrum and ULPC chromatogram of LE3G (*Methyl lucidone*) by using Waters Q-TOF Premier

## Elemental Composition Report

Single Mass Analysis

Tolerance = 10.0 PPM / DBE: min = -1.5, max = 50.0

Element prediction: Off

Number of isotope peaks used for i-FIT = 3

Monoisotopic Mass, Even Electron Ions

47 formula(e) evaluated with 1 results within limits (up to 50 best isotopic matches for each mass)

Elements Used:

C: 0-500 H: 0-1000 O: 0-200

Minimum:

Maximum:

| Mass     | Calc. Mass | mDa | PPM | DBE | i-FIT | Norm | Conf(%) | Formula                                        |
|----------|------------|-----|-----|-----|-------|------|---------|------------------------------------------------|
| 271.0990 | 271.0970   | 2.0 | 7.4 | 9.5 | 40.1  | n/a  | n/a     | C <sub>16</sub> H <sub>15</sub> O <sub>4</sub> |

LE\_Total\_jeje 180 (3.540) Cm (180:182)

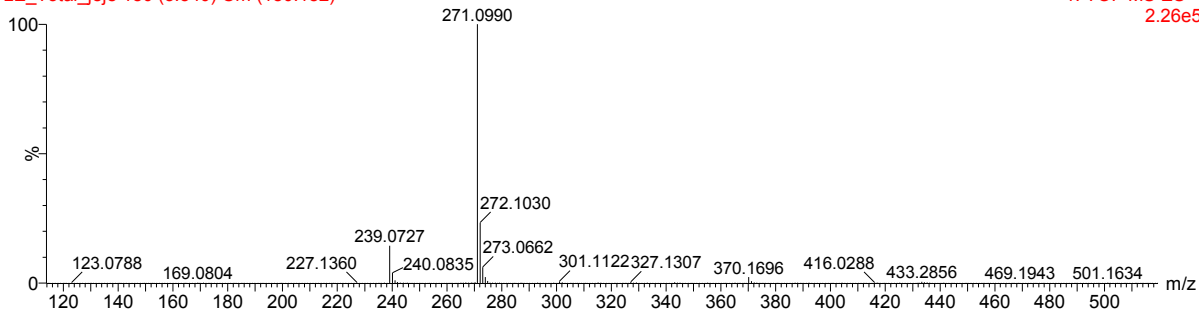

LE\_03G\_pos

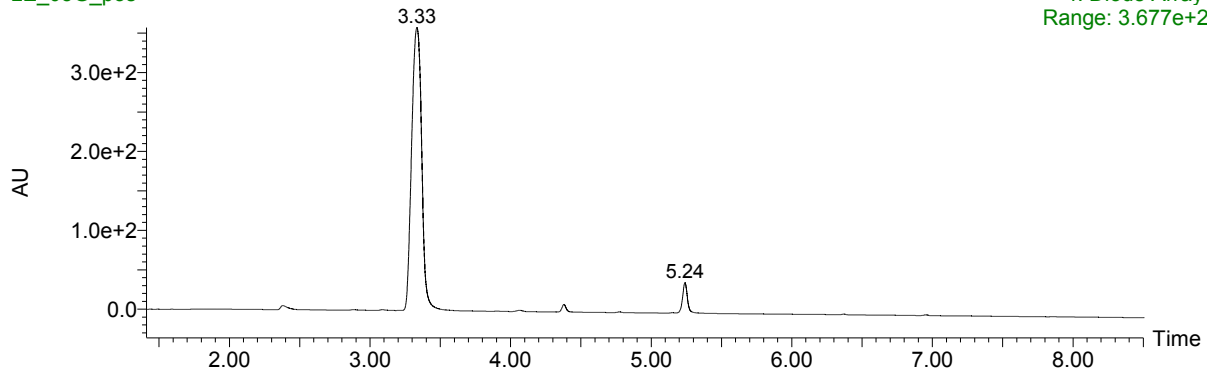

# Supplementary Fig. S3N

Elemental composition report, HRESIMS spectrum and ULPC chromatogram of SS2A (*Solidago acid A*) by using Waters Q-TOF Premier

Elemental Composition Report  
Single Mass Analysis  
Tolerance = 10.0 PPM / DBE: min = -1.5, max = 50.0  
Element prediction: Off  
Number of isotope peaks used for i-FIT = 3  
Monoisotopic Mass, Even Electron Ions  
61 formula(e) evaluated with 2 results within limits (up to 50 best isotopic matches for each mass)  
Elements Used:  
C: 0-500 H: 0-1000 O: 0-200

| Mass     | Calc. Mass | mDa  | PPM  | DBE  | i-FIT | Norm  | Conf(%) | Formula                                        |
|----------|------------|------|------|------|-------|-------|---------|------------------------------------------------|
| 315.1989 | 315.1960   | 2.9  | 9.2  | 7.5  | 34.4  | 0.211 | 81.01   | C <sub>20</sub> H <sub>27</sub> O <sub>3</sub> |
|          | 315.2019   | -3.0 | -9.5 | -1.5 | 35.8  | 1.661 | 18.99   | C <sub>13</sub> H <sub>31</sub> O <sub>8</sub> |

SE\_02A\_0114 527 (10.375) Cm (527:529)

1: TOF MS ES-  
2.37e4

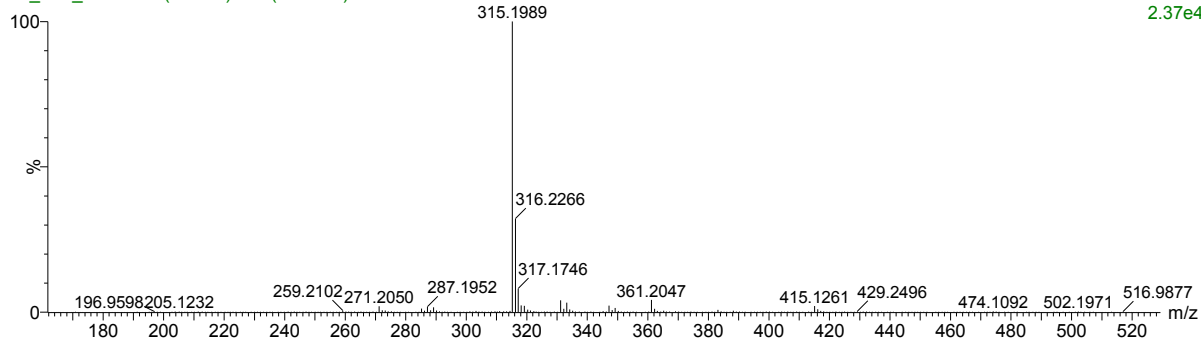

SE\_02A\_0114

4: Diode Array  
Range: 5.272e+1

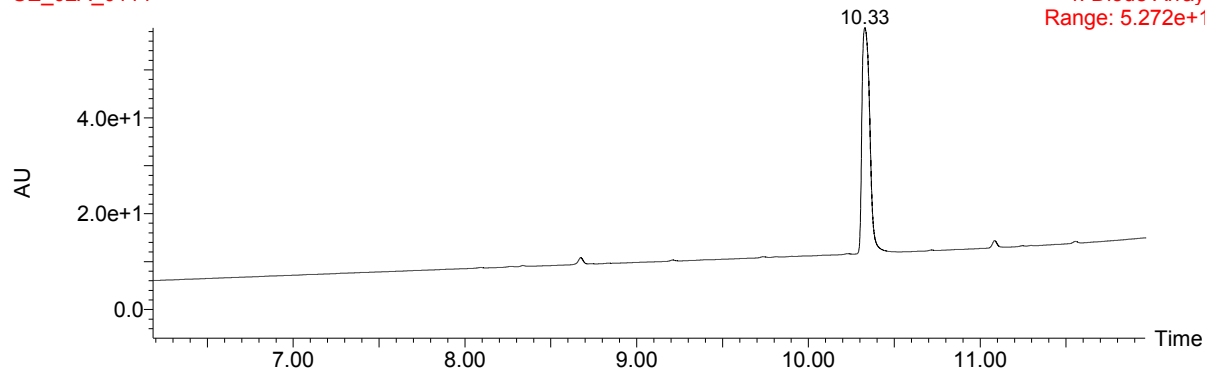

# Supplementary Fig. S30

Elemental composition report, HRESIMS spectrum and ULPC chromatogram of SS5A (*Kingidiol*) by using Waters Q-TOF Premier 

Elemental Composition Report  
Single Mass Analysis  
Tolerance = 10.0 PPM / DBE: min = -1.5, max = 50.0  
Element prediction: Off  
Number of isotope peaks used for i-FIT = 3  
Monoisotopic Mass, Even Electron Ions  
77 formula(e) evaluated with 1 results within limits (up to 50 best isotopic matches for each mass)  
Elements Used:  
C: 0-500 H: 0-1000 O: 0-200  
Minimum: -1.5  
Maximum: 50.0  
Mass Calc. Mass mDa PPM DBE i-FIT Norm Conf(%) Formula  
363.2184 363.2171 1.3 3.6 6.5 35.7 n/a n/a C21 H31 O5

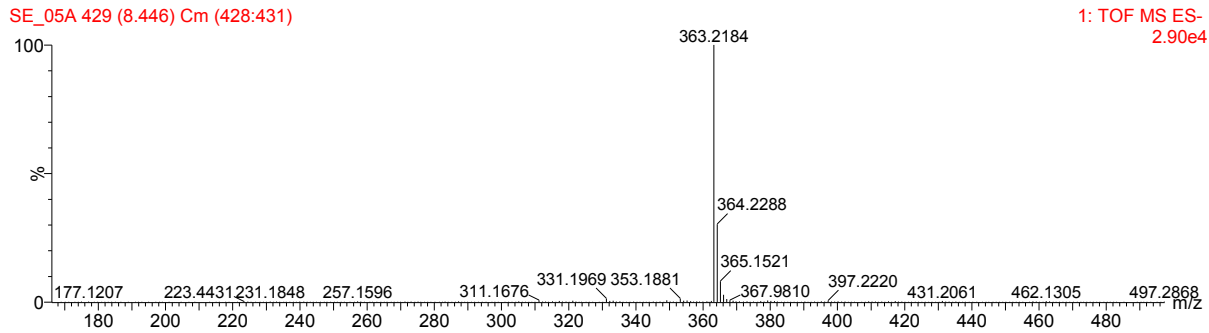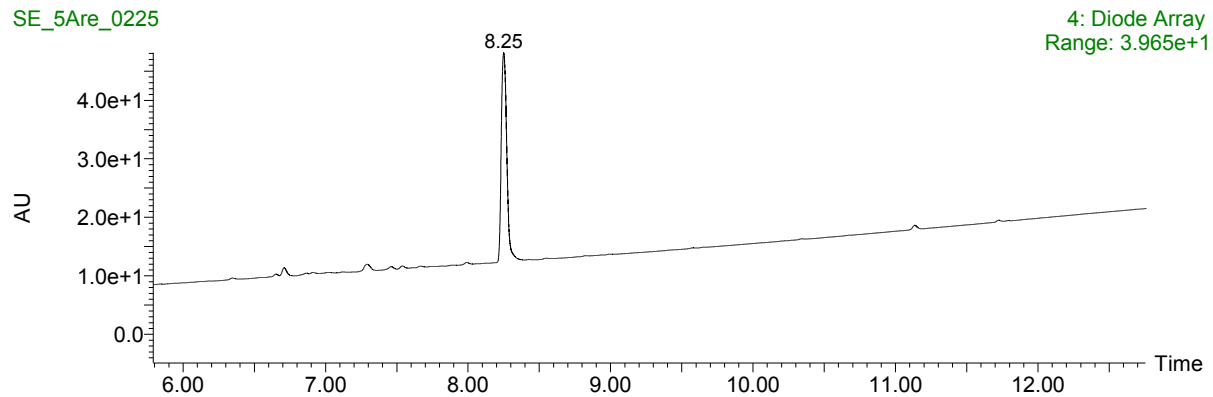

Supplement: pnas.1424386112.sfig03.pdf [file pnas.1424386112.sfig03.pdf]
