# Supplementary material
Source: PubMed Central journal article supplement (PMC4330767)
Supplement: pnas.201424386SI.pdf [file pnas.201424386SI.pdf]

# Supporting Information

Lee et al. 10.1073/pnas.1424386112

**Table S1.** List of 53 plant species extract of which exhibited the JHAN activity and mosquito larvicidal toxicity

| Plant family     | Plant species                                    | Plant part      |
|------------------|--------------------------------------------------|-----------------|
| Aceraceae        | <i>Acer takesimense</i>                          | Trunk-bark      |
| Araliaceae       | <i>Hedera rhombea</i>                            | Fruit           |
| Araliaceae       | <i>Kalopanax pictus</i>                          | Trunk-bark      |
| Araliaceae       | <i>Acanthopanax chiisanensis</i>                 | Trunk           |
| Araliaceae       | <i>Oplopanax elatus</i>                          | Trunk           |
| Araliaceae       | <i>Aralia continentalis</i>                      | Whole           |
| Aristolochiaceae | <i>Aristolochia manshuriensis</i>                | Trunk           |
| Betulaceae       | <i>Betula schmidtii</i>                          | Leaf            |
| Betulaceae       | <i>Alnus japonica</i>                            | Flower          |
| Betulaceae       | <i>Alnus firma</i>                               | Flower          |
| Celastraceae     | <i>Euonymus sieboldiana</i>                      | Fruit           |
| Compositae       | <i>Aster koraiensis</i>                          | Flower          |
| Compositae       | <i>Solidago serotina</i>                         | Root            |
| Compositae       | <i>Rudbeckia laciniata</i> var. <i>hortensis</i> | Root            |
| Compositae       | <i>Carpesium abrotanoides</i>                    | Flower          |
| Compositae       | <i>Siegesbeckia glabrescens</i>                  | Whole           |
| Compositae       | <i>Helianthus annuus</i>                         | Fruit-seed      |
| Cupressaceae     | <i>Thuja orientalis</i>                          | Trunk-bark      |
| Cupressaceae     | <i>Juniperus virginiana</i>                      | Leaf-trunk      |
| Cupressaceae     | <i>Juniperus communis</i>                        | Trunk-bark      |
| Ericaceae        | <i>Rhododendron micranthum</i>                   | Leaf-trunk      |
| Euphorbiaceae    | <i>Euphorbia ebracteolata</i>                    | Root            |
| Euphorbiaceae    | <i>Mallotus japonicus</i>                        | Exciple         |
| Lauraceae        | <i>Actinodaphne lancifolia</i>                   | Whole           |
| Lauraceae        | <i>Neolitsea sericea</i>                         | Fruit           |
| Lauraceae        | <i>Lindera obtusiloba</i>                        | Trunk-bark      |
| Lauraceae        | <i>Lindera erythrocarpa</i>                      | Fruit           |
| Leguminosae      | <i>Trifolium pratense</i>                        | Whole           |
| Leguminosae      | <i>Sophora flavescens</i>                        | Root            |
| Leguminosae      | <i>Albizia julibrissin</i>                       | Trunk-bark      |
| Liliaceae        | <i>Majanthemum dilatatum</i>                     | Flower          |
| Magnoliaceae     | <i>Magnolia sieboldii</i>                        | Trunk           |
| Moraceae         | <i>Ficus carica</i>                              | Trunk-bark      |
| Pinaceae         | <i>Pinus thunbergii</i>                          | Trunk-heartwood |
| Pinaceae         | <i>Pinus banksiana</i>                           | Trunk           |
| Pinaceae         | <i>Pinus densiflora</i>                          | Root            |
| Pinaceae         | <i>Pinus koraiensis</i>                          | Root            |
| Pinaceae         | <i>Pinus densiflora</i> for. <i>multicaulis</i>  | Trunk           |
| Pinaceae         | <i>Pinus bungeana</i>                            | Trunk           |
| Primulaceae      | <i>Primula modesta</i> var. <i>fauriae</i>       | Whole           |
| Pteridaceae      | <i>Matteuccia orientalis</i>                     | Whole           |
| Rosaceae         | <i>Spiraea microgyna</i>                         | Seed            |
| Rutaceae         | <i>Citrus junos</i>                              | Root            |
| Salicaceae       | <i>Salix hallaisanensis</i>                      | Leaf            |
| Saxifragaceae    | <i>Hydrangea macrophylla</i> for. <i>otaksa</i>  | Grass           |
| Sterculiaceae    | <i>Firmiana simplex</i>                          | Leaf-trunk      |
| Taxodiaceae      | <i>Sciadopitys verticillata</i>                  | Leaf            |
| Umbelliferae     | <i>Angelica czernevia</i>                        | Root            |
| Umbelliferae     | <i>Peucedanum japonicum</i>                      | Root            |
| Urticaceae       | <i>Pilea hamaoi</i>                              | Whole           |
| Valerianaceae    | <i>Patrinia scabiosaefolia</i>                   | Seed            |
| Verbenaceae      | <i>Caryopteris divaricata</i>                    | Seed            |
| Zingiberaceae    | <i>Zingiber officinale</i>                       | Root            |

**Table S2. Prolonged effect of LE3B on mosquito development**

|           | Overnight survival | Days to adult emergence | Peak day to adult emergence | Length of ovaries ( $\mu\text{m}$ ) | Ovarian follicles: Mean diameter ( $\mu\text{m}$ ) | Numbers of follicles per ovary |
|-----------|--------------------|-------------------------|-----------------------------|-------------------------------------|----------------------------------------------------|--------------------------------|
| LE3B-1    | 10/20              | 8–14                    | 10                          |                                     | 89.5 $\pm$ 11.4*                                   | 60.8 $\pm$ 24.2*               |
| LE3B-2    | 15/20              | 10–18                   | 11                          | Seven individuals                   |                                                    |                                |
| LE3B-3    | 13/20              | 9–18                    | 16                          | 968.1 $\pm$ 224.9*                  |                                                    |                                |
| Control-1 | 19/20              | 14–22                   | 19                          |                                     | 115.1 $\pm$ 16.1                                   | 102.8 $\pm$ 17.4               |
| Control-2 | 18/20              | 14–23                   | 19                          | Seven individuals                   |                                                    |                                |
| Control-2 | 19/20              | 13–22                   | 18                          | 1,529.3 $\pm$ 215.2                 |                                                    |                                |

\* $P < 0.001$ ,  $t$  test.**Table S3. Phylogenetic distribution of plants with JHAN activity**

| Phylum       | Class            | Subclass        | Family           | Seventy-two species with anti-juvenoid activity | Hypergeometrical distribution | Fifty-three species with anti-juvenoid and larvicidal toxicity | Hypergeometrical distribution | 1,651 total plant species |
|--------------|------------------|-----------------|------------------|-------------------------------------------------|-------------------------------|----------------------------------------------------------------|-------------------------------|---------------------------|
| Angiospermae | Dicotyledoneae   | Archichlamydeae | Aceraceae        | 2                                               |                               | 1                                                              |                               | 21                        |
| Angiospermae | Dicotyledoneae   | Archichlamydeae | Amaranthaceae    | 2                                               |                               | 0                                                              |                               | 9                         |
| Angiospermae | Dicotyledoneae   | Archichlamydeae | Araliaceae       | 5                                               | 0.0001                        | 5                                                              | 2.90E-05                      | 13                        |
| Angiospermae | Dicotyledoneae   | Archichlamydeae | Aristolochiaceae | 1                                               |                               | 1                                                              |                               | 4                         |
| Angiospermae | Dicotyledoneae   | Archichlamydeae | Berberidaceae    | 1                                               |                               | 0                                                              |                               | 7                         |
| Angiospermae | Dicotyledoneae   | Archichlamydeae | Betulaceae       | 3                                               |                               | 3                                                              |                               | 19                        |
| Angiospermae | Dicotyledoneae   | Archichlamydeae | Celastraceae     | 2                                               |                               | 1                                                              |                               | 14                        |
| Angiospermae | Dicotyledoneae   | Archichlamydeae | Euphorbiaceae    | 2                                               |                               | 2                                                              |                               | 22                        |
| Angiospermae | Dicotyledoneae   | Archichlamydeae | Lauraceae        | 4                                               | 0.0016                        | 4                                                              | 0.0005                        | 13                        |
| Angiospermae | Dicotyledoneae   | Archichlamydeae | Leguminosae      | 4                                               |                               | 3                                                              |                               | 71                        |
| Angiospermae | Dicotyledoneae   | Archichlamydeae | Magnoliaceae     | 2                                               |                               | 1                                                              |                               | 9                         |
| Angiospermae | Dicotyledoneae   | Archichlamydeae | Moraceae         | 1                                               |                               | 1                                                              |                               | 18                        |
| Angiospermae | Dicotyledoneae   | Archichlamydeae | Rosaceae         | 1                                               |                               | 1                                                              |                               | 107                       |
| Angiospermae | Dicotyledoneae   | Archichlamydeae | Rutaceae         | 1                                               |                               | 1                                                              |                               | 15                        |
| Angiospermae | Dicotyledoneae   | Archichlamydeae | Salicaceae       | 1                                               |                               | 1                                                              |                               | 18                        |
| Angiospermae | Dicotyledoneae   | Archichlamydeae | Saxifragaceae    | 2                                               |                               | 1                                                              |                               | 32                        |
| Angiospermae | Dicotyledoneae   | Archichlamydeae | Simaroubaceae    | 1                                               |                               | 0                                                              |                               | 2                         |
| Angiospermae | Dicotyledoneae   | Archichlamydeae | Sterculiaceae    | 1                                               |                               | 1                                                              |                               | 3                         |
| Angiospermae | Dicotyledoneae   | Archichlamydeae | Theaceae         | 2                                               |                               | 0                                                              |                               | 9                         |
| Angiospermae | Dicotyledoneae   | Archichlamydeae | Umbelliferae     | 3                                               |                               | 2                                                              |                               | 38                        |
| Angiospermae | Dicotyledoneae   | Archichlamydeae | Urticaceae       | 1                                               |                               | 1                                                              |                               | 15                        |
| Angiospermae | Dicotyledoneae   | Sympetalae      | Caprifoliaceae   | 1                                               |                               | 0                                                              |                               | 30                        |
| Angiospermae | Dicotyledoneae   | Sympetalae      | Compositae       | 7                                               |                               | 6                                                              |                               | 158                       |
| Angiospermae | Dicotyledoneae   | Sympetalae      | Ericaceae        | 1                                               |                               | 1                                                              |                               | 6                         |
| Angiospermae | Dicotyledoneae   | Sympetalae      | Lentibulariaceae | 1                                               |                               | 0                                                              |                               | 1                         |
| Angiospermae | Dicotyledoneae   | Sympetalae      | Primulaceae      | 1                                               |                               | 1                                                              |                               | 9                         |
| Angiospermae | Dicotyledoneae   | Sympetalae      | Valerianaceae    | 1                                               |                               | 1                                                              |                               | 7                         |
| Angiospermae | Dicotyledoneae   | Sympetalae      | Verbenaceae      | 1                                               |                               | 1                                                              |                               | 10                        |
| Angiospermae | Monocotyledoneae |                 | Cyperaceae       | 1                                               |                               | 0                                                              |                               | 32                        |
| Angiospermae | Monocotyledoneae |                 | Gramineae        | 1                                               |                               | 0                                                              |                               | 60                        |
| Angiospermae | Monocotyledoneae |                 | Liliaceae        | 3                                               |                               | 1                                                              |                               | 63                        |
| Angiospermae | Monocotyledoneae |                 | Zingiberaceae    | 1                                               |                               | 1                                                              |                               | 2                         |
| Gymnospermae | Coniferopsida    |                 | Cupressaceae     | 4                                               | 0.0008                        | 3                                                              | 0.004                         | 11                        |
| Gymnospermae | Coniferopsida    |                 | Pinaceae         | 8                                               | 1.51E-07                      | 6                                                              | 7.40E-06                      | 17                        |
| Gymnospermae | Coniferopsida    |                 | Taxodiaceae      | 1                                               |                               | 1                                                              |                               | 4                         |
| Pteridophyta |                  |                 | Pteridaceae      | 2                                               |                               | 1                                                              |                               | 32                        |

Plant extracts that had either JHAN activity or both JHAN activity and larvicidal toxicity were grouped into the corresponding plant families. Significantly overrepresented families (hypergeometric distribution,  $P < 0.01$ ) are highlighted in yellow.

**Fig. S1.** Pyriproxyfen-mediated binding of *A. aegypti* Met-CYC, *C. pipiens* Met-CYC, and *T. castaneum* Met-SRC was observed by means of the growth complementation test of Y2HGold yeast cells transformed with each corresponding pair of plasmids.

[Fig. S1](#)

**Fig. S2.** Quantitative  $\beta$ -galactosidase assay with Y187 yeast cells transformed with each corresponding pair of plasmids.

[Fig. S2](#)

**Fig. S3.** Molecular characterization of five PJHAN compounds isolated from two plant extracts: *L. erythrorocarpa* fruits and *S. serotina* roots.  $^1\text{H}$ -NMR spectrum of each compound (A–E),  $^{13}\text{C}$ -NMR spectrum of each compound (F–J), and elemental composition report combined with HRESIMS spectrum and ULPC chromatogram of each compound (K–O) is shown.

[Fig. S3](#)

**Fig. S4.** The cytotoxicity test of purified compounds with HEK293 cells by WST-1 assay.

[Fig. S4](#)

**Fig. S5.** The exposure of mosquito second-instar larvae to LE3B impaired the ovary development in adult female mosquitoes that emerged from the di-terpene-treated larvae.

[Fig. S5](#)
