# Supplementary material
Source: PubMed Central journal article supplement (PMC4330767)
Supplement: pnas.1424386112.sfig01.pdf [file pnas.1424386112.sfig01.pdf]

+pyriproxyfen

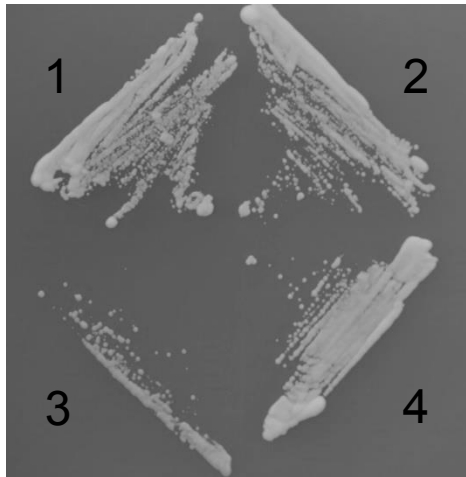

-pyriproxyfen

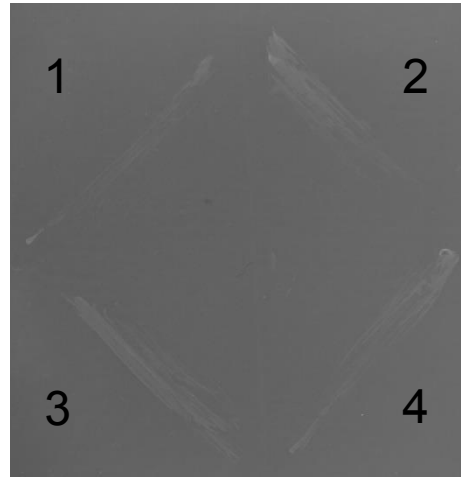

1. *A. aegypti* Met-CYC
2. *C. pipiens* Met-CYC
3. *T. castaneum* Met-CYC
4. *T. castaneum* Met-SRC
