# Supplementary material
Source: PubMed Central journal article supplement (PMC4330767)

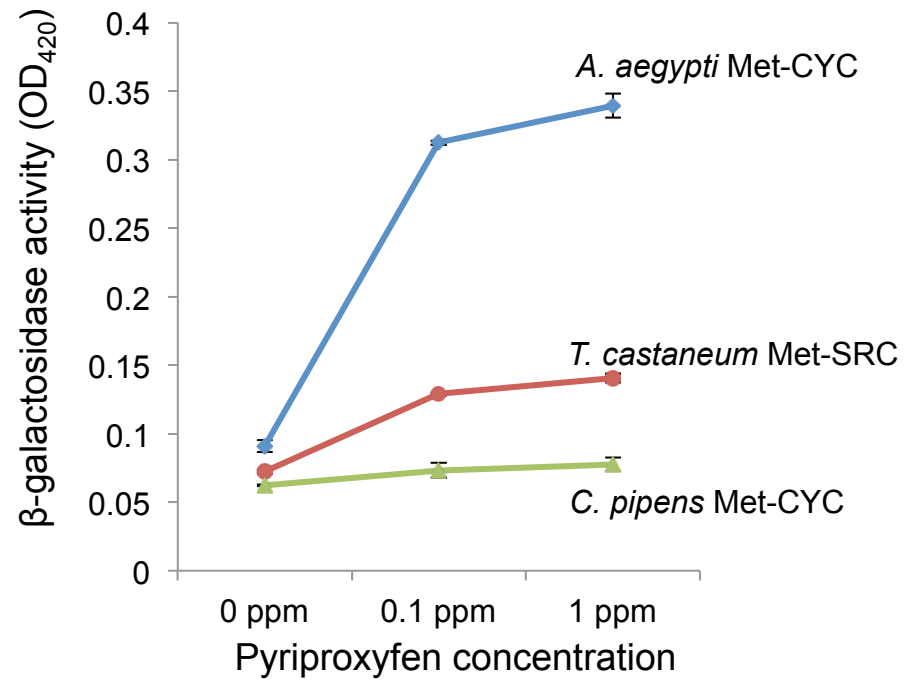

Supplement: pnas.1424386112.sfig02.pdf [file pnas.1424386112.sfig02.pdf]

**WST-1 assay****Viability(%)**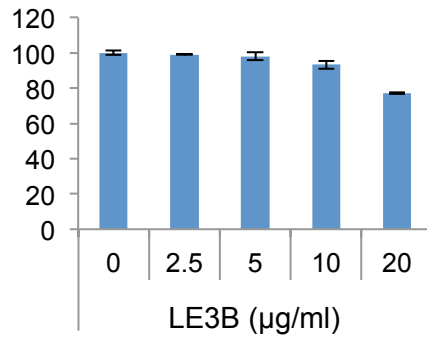**Viability(%)**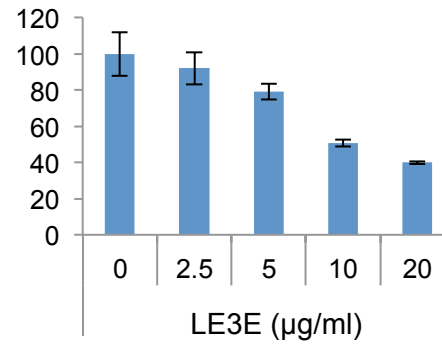**Viability(%)**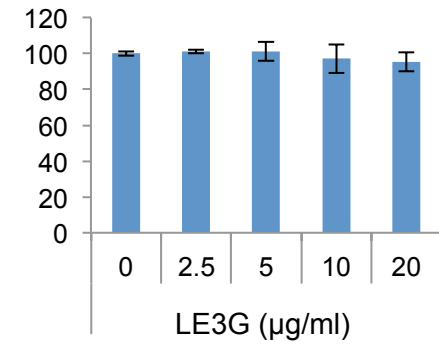**Viability(%)**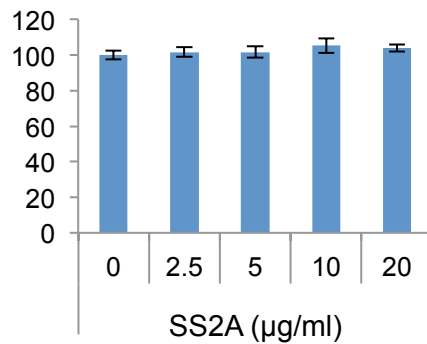**Viability(%)**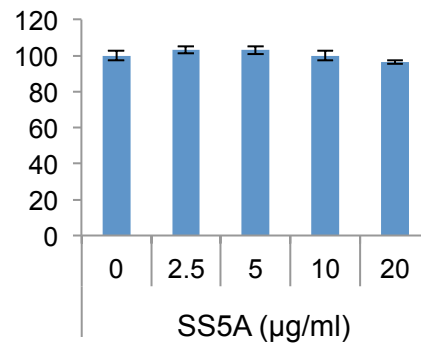

Supplement: pnas.1424386112.sfig04.pdf [file pnas.1424386112.sfig04.pdf]

LE3B

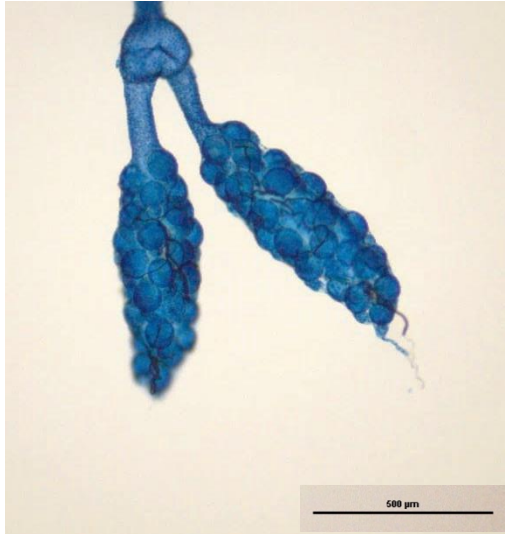

DMSO

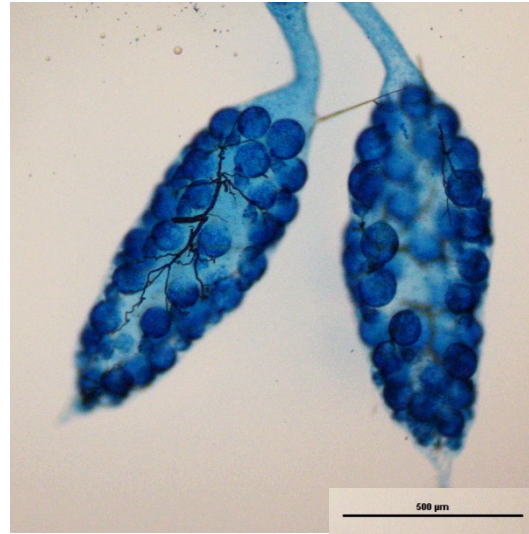

Supplement: pnas.1424386112.sfig05.pdf [file pnas.1424386112.sfig05.pdf]
